# Supplementary material for: Therapeutic application of anti-angiogenic nanomaterials in cancers
Source: Royal Society of Chemistry journal article supplement (doi:10.1039/c5nr07887c), 2016-01-01
Supplement: c5nr07887c1.pdf [file c5nr07887c1.pdf]

**Table 1: Stimulators of Angiogenesis**

| <b>Angiogenic Stimulator</b> | <b>Functions</b>                                                                                                                                                         | <b>Reference</b> |
|------------------------------|--------------------------------------------------------------------------------------------------------------------------------------------------------------------------|------------------|
| VEGF                         | Inducer of angiogenesis and lymphangiogenesis.                                                                                                                           | 34,35            |
| FGF                          | Regulates endothelial cells proliferation, migration and differentiation.                                                                                                | 35               |
| HGF                          | Stimulates cell growth. Useful for the treatment of critical limb ischemia.                                                                                              | 36               |
| Ang1 and Ang2                | Stimulates the matured vessel formation and regulate angiogenesis.                                                                                                       | 37               |
| PDGF                         | Stimulates angiogenesis and regulate cell growth and division.                                                                                                           | 38               |
| IGF                          | Stimulates angiogenesis and myogenesis and induces nerve regeneration.                                                                                                   | 39               |
| Endoglin                     | Stimulates endothelial cell proliferation, extracellular matrix production and TGF- $\beta$ /ALK1 signal transduction.                                                   | 40               |
| Interleukin 8                | Stimulates endothelial cell proliferation, survival and matrix metalloproteinases.                                                                                       | 41               |
| Thyroxin                     | Stimulates early coronary angiogenesis.                                                                                                                                  | 42               |
| VE-cadherin                  | Stimulates endothelial junctional molecules.                                                                                                                             | 43               |
| G-CSF                        | Helps in endothelial cell proliferation and act as neuro-protective agent.                                                                                               | 44               |
| Integrins                    | Promote cell attachment and stimulates cell migration.                                                                                                                   | 45               |
| Ephrin                       | Helps in vascular development and angiogenic remodeling also determine the formation of arteries or veins.                                                               | 46               |
| eNOS                         | Stimulates angiogenesis via eNOS signaling cascade.                                                                                                                      | 47               |
| TGFbeta                      | Induces angiogenesis through VEGF-mediated apoptosis. Plays a dual role as a tumor suppressor in early stages and as tumor promoter in late stages of tumor progression. | 48, 49           |
| YKL40                        | Angiogenic factor to promote tumor angiogenesis and plays role in radioresistance, and progression of glioblastoma.                                                      | 50, 51           |
| HIF1 $\alpha$                | Regulate tumor angiogenesis and invasion.                                                                                                                                | 52               |

|             |                                                                                                      |        |
|-------------|------------------------------------------------------------------------------------------------------|--------|
| HDGF        | Plays vital roles in cancer cell transformation, angiogenesis, apoptosis and metastasis.             | 53     |
| Notch/DLL4  | Negative regulator of tumor angiogenesis and upregulated in tumor vasculature in cancer progression. | 54, 55 |
| Semaphorins | Anti-angiogenic agents, stimulate tumor angiogenesis.                                                | 56     |

**Table 2: Anti-angiogenic drugs for the treatment of tumor**

| <b>Anti-angiogenic Drugs</b> | <b>Mechanism of action</b>                               | <b>Cancer types</b>                                     | <b>Ref.</b> |
|------------------------------|----------------------------------------------------------|---------------------------------------------------------|-------------|
| Avastin                      | Anti-VEGF monoclonal antibody                            | Advanced metastatic colorectal cancer and glioblastoma. | 75          |
| Sunitinib                    | Act as multi-TKI that targets VEGFR-1-3, PDGFR.          | Kidney cancer and neuroendocrine tumors                 | 76,77       |
| Sorafenib                    | TKI which targets VEGFR-2, -3, Flt-3 PDGFR-b.            | Primary kidney cancer, RCC, liver cancer.               | 77,78       |
| Everolimus                   | Inhibitor of mammalian target of rapamycin (mTOR)        | Kidney cancer and neuroendocrine tumors                 | 79          |
| Imatinib                     | (TKI) Selective inhibitor of Bcr/Abl                     | CML and GIST.                                           | 80          |
| Pazopanib                    | Act as multi-targeted receptor tyrosine kinase inhibitor | Kidney cancer and soft tissue sarcoma                   | 81          |
| Axitinib                     | Second generation inhibitor of VEGF-1, 2, and 3.         | Renal cell carcinoma                                    | 82          |
| Denibulin                    | Vascular-disrupting agent (VDA) and reversibly inhibits  | Solid tumors                                            | 72          |

|                      |                                      |                                                                              |       |
|----------------------|--------------------------------------|------------------------------------------------------------------------------|-------|
| (MN-029)             | microtubule assembly.                |                                                                              |       |
| ZD6126               | Vascular targeting agent and VDA     | Metastatic renal cell carcinoma and metastatic colorectal cancer             | 73    |
| ABT-571              | VDA and acts as antimetabolic agent. | Non-small cell lung cancer                                                   | 71,83 |
| Ombrabulin (AVE8062) | VDA                                  | Advanced-stage soft-tissue sarcoma and head and neck squamous cell carcinoma | 71,83 |

---

**Table 3: Anti-angiogenic nanomaterials and their therapeutic applications**

| <b>Serial No.</b> | <b>Nature of nanoparticles</b>     | <b>Anti-angiogenic activity</b>                     | <b>Ref.</b> |
|-------------------|------------------------------------|-----------------------------------------------------|-------------|
| 1                 | Cerium oxide                       | Ovarian tumor model                                 | 119         |
| 2                 | Fullerenols (F) and its conjugates | Zebrafish and murine tumor angiogenesis models      | 113         |
| 3                 | Chitosan                           | Inhibition of hepatocellular carcinoma xenografts   | 120         |
| 4                 | Fullerenic                         | Inhibition of MCF-7 breast tumor model              | 121         |
| 5                 | Tetrac                             | Inhibition of Human Renal Cell Carcinoma Xenografts | 122         |
| 6                 | Biosynthesized AgNPs               | Anti-angiogenic activity                            | 123         |
| 7                 | Carbon                             | Inhibition of glioblastoma multiforme               | 124         |
| 8                 | Gold                               | Anti-angiogenic activity in HUVEC                   | 125         |
| 9                 | Gold                               | Anti-angiogenic activity in CAM model               | 126         |
| 10                | Functional peptide With AuNPs      | Inhibition of <i>in vitro</i> angiogenesis          | 127         |
| 11                | GO & rGO                           | Switchable angiogenic and anti-angiogenic activity  | 114         |
| 12                | Gold                               | Ovarian cancer in mouse model                       | 128         |

|    |                                           |                                                                      |     |
|----|-------------------------------------------|----------------------------------------------------------------------|-----|
| 13 | Biogenic AgNPs                            | Anti-Angiogenesis effect on CAM                                      | 129 |
| 14 | Cuprous oxide                             | Inhibition of angiogenesis via down regulation of VEGFR2 expression  | 130 |
| 15 | Carbon nanomaterials: and its derivative. | Anti-angiogenic activity through the down-regulation of KDR          | 131 |
| 16 | Silicate                                  | Anti-angiogenic effect on retinal neovascularization                 | 132 |
| 17 | NAMI-A-loaded mesoporous silica           | Inhibition of angiogenesis by the production of ROS                  | 133 |
| 18 | Perfluoro carbon                          | Diagnosis and treatment of atherosclerosis                           | 134 |
| 19 | Magnetic mesoporous silica-based siRNA    | Orthotropic ovarian cancer therapy                                   | 135 |
| 20 | Peptide                                   | Anti-angiogenic therapy in glioma model                              | 118 |
| 21 | AuNPs & AgNPs with heparin                | Inhibition of FGF2 induced angiogenesis                              | 136 |
| 22 | Gold                                      | Anti-angiogenic activity through heparin-binding glycoproteins       | 137 |
| 23 | Biosynthesized AgNPs                      | Inhibition of VEGF-and IL-1 - induced vascular permeability in PRECs | 138 |
| 24 | Perfluorocarbon                           | Anti-neovascular efficacy in the rabbitVx2 cancer model              | 139 |

---
